# Supplementary material for: Management of Parkinson's Disease medication in acutely admitted patients
Source: PubMed Central journal article supplement — BMJ Qual Improv Rep. 2012 Oct 24;1(1):u473.w154. doi: 10.1136/bmjquality.u473.w154 (PMC4652681; doi:10.1136/bmjquality.u473.w154), 2012-10-24
Supplement: bmjqir.u473.w154-s1.pdf [file bmjqir.u473.w154-s1.pdf]

**Percentage of accurate PD medication prescriptions  
- Cycle 1**

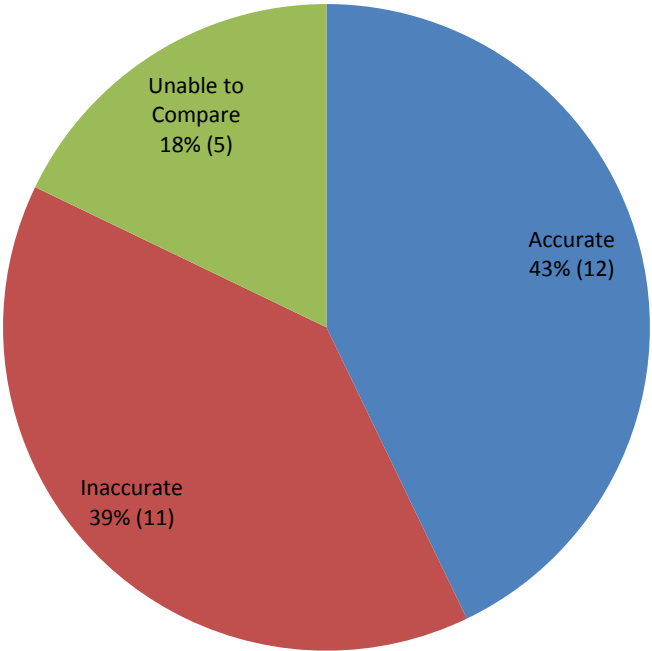

**Fig. 1 Percentage of accurate PD prescriptions in the first cycle.**
