# Supplementary material for: Management of Parkinson's Disease medication in acutely admitted patients
Source: PubMed Central journal article supplement — BMJ Qual Improv Rep. 2012 Oct 24;1(1):u473.w154. doi: 10.1136/bmjquality.u473.w154 (PMC4652681; doi:10.1136/bmjquality.u473.w154), 2012-10-24
Supplement: bmjqir.u473.w154-s2.pdf [file bmjqir.u473.w154-s2.pdf]

**What resources would you use to prescribe usual PD medications?**

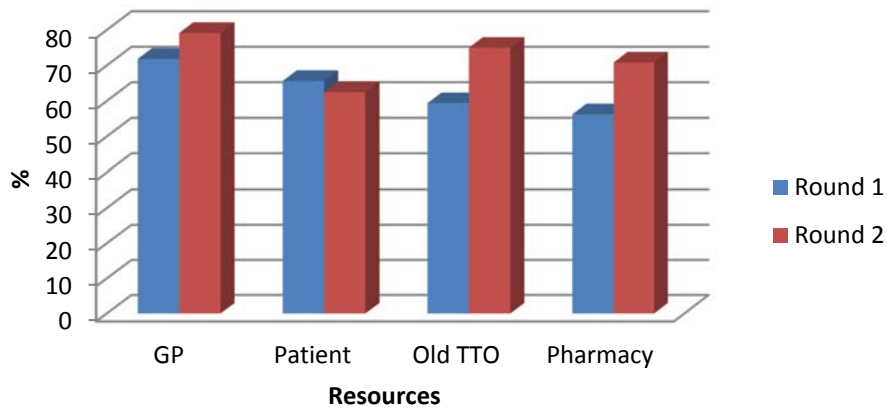

**What resources would you use to ensure that PD medications were prescribed at the right time?**

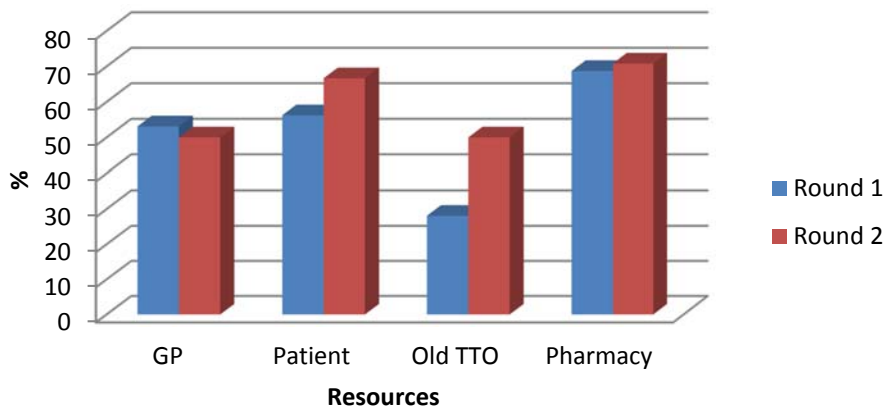

**What are the consequences of missed PD medications?**

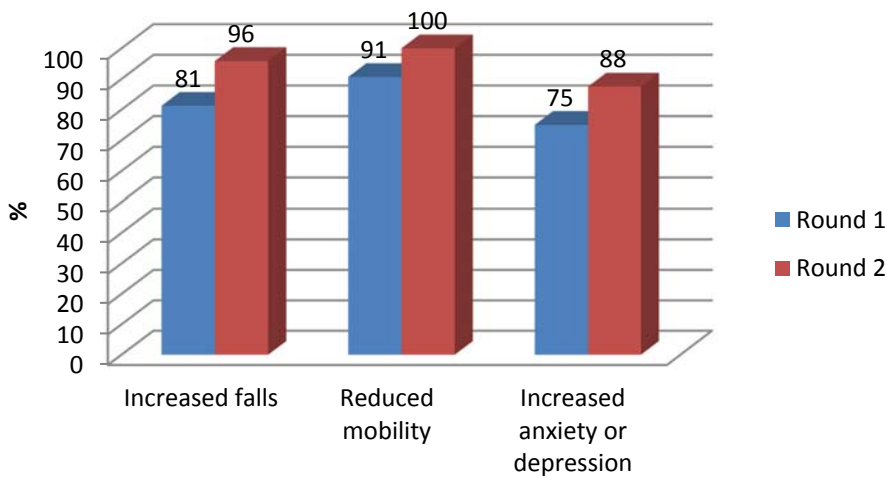

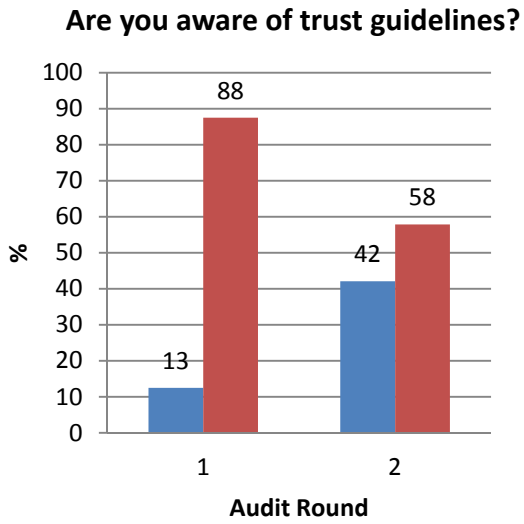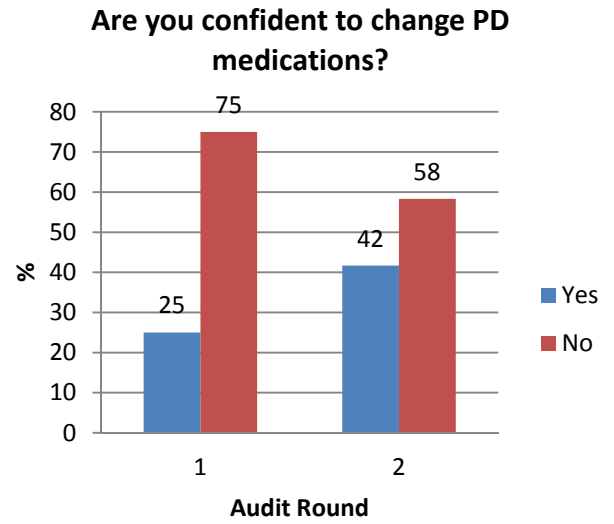

Percentage of accurate PD medication prescriptions - Cycle 2

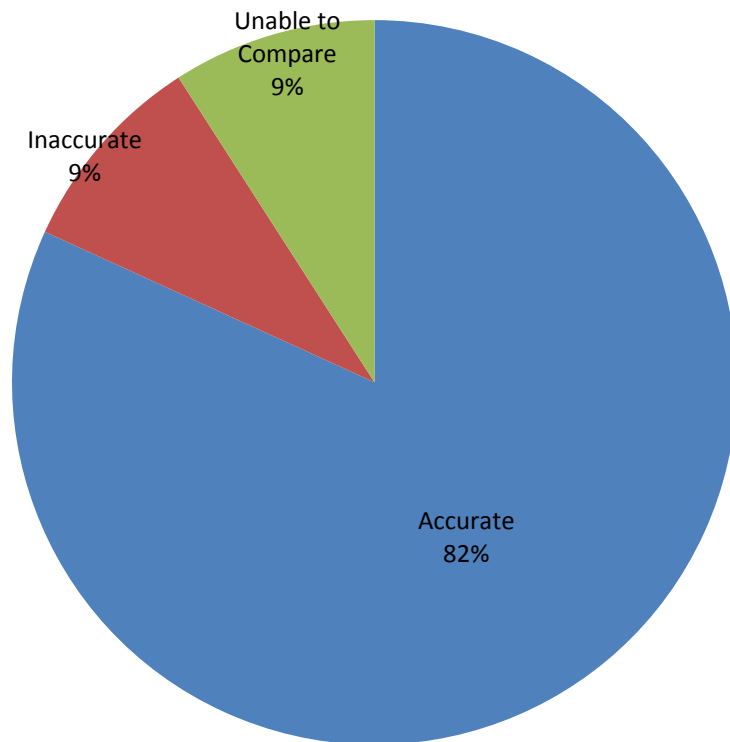

Fig. 1 Percentage of accurate PD prescriptions in the second cycle.
